# Supplementary material for: Interaction of l-cysteine with naked gold nanoparticles supported on HOPG: a high resolution XPS investigation
Source: Royal Society of Chemistry journal article supplement (doi:10.1039/c2nr32741d), 2012-01-01
Supplement: c2nr32741d.pdf [file c2nr32741d.pdf]

Electronic Supplementary Information

## **Interaction of L-Cysteine with *naked* gold nanoparticles supported on HOPG: A high resolution XPS investigation**

Laura Caprile,<sup>a</sup> Albano Cossaro,<sup>b</sup> Ermelinda Falletta,<sup>c</sup> Cristina Della Pina,<sup>c</sup> Ornella Cavalleri,<sup>a</sup>  
Ranieri Rolandi,<sup>a</sup> Silvana Terreni,<sup>a</sup> Riccardo Ferrando,<sup>a</sup> Michele Rossi,<sup>c</sup> Luca Floreano,<sup>b</sup> and Maurizio Canepa,<sup>a</sup>

<sup>a</sup> *CNISM and Dipartimento di Fisica, Università di Genova, via Dodecaneso 33, Genova, Italy. Tel: +39 010 3536242; E-mail: canepa@fisica.unige.it*

<sup>b</sup> *CNR-IOM, Trieste, Italy.*

<sup>c</sup> *Dipartimento di Chimica, Università di Milano, Milano, Italy.*

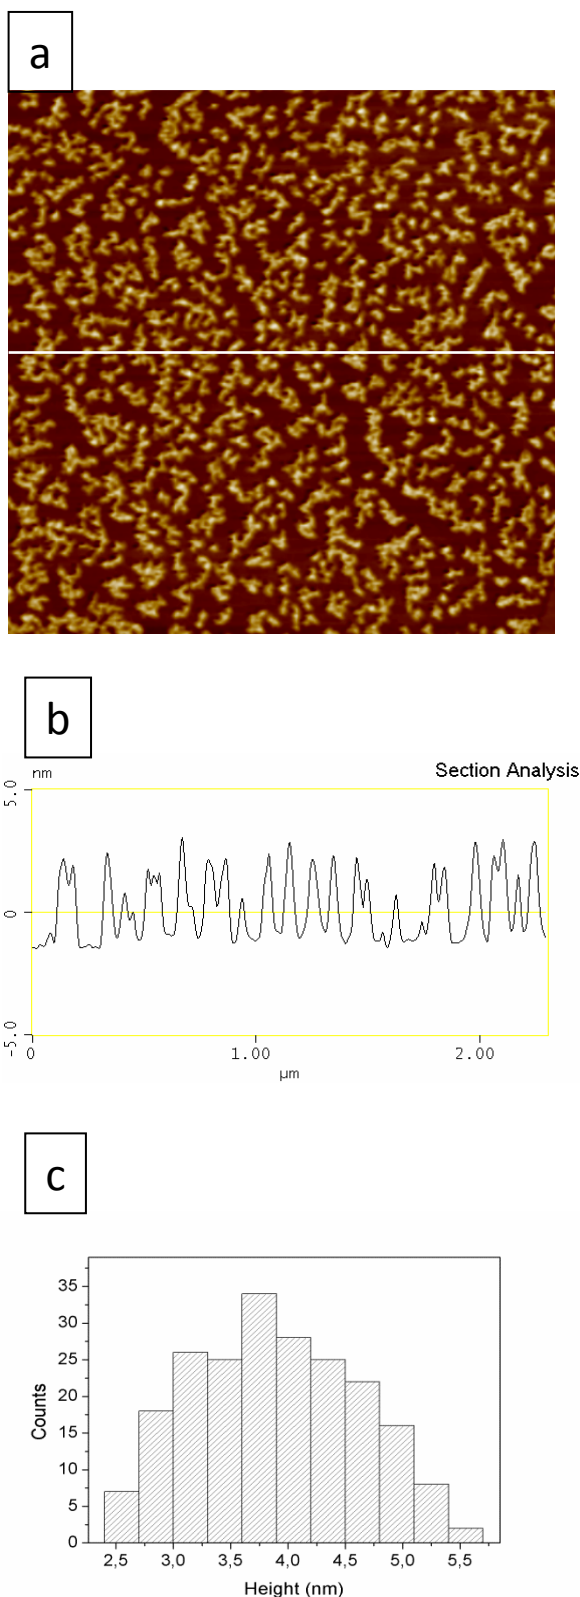

Fig.1 a) AFM (tapping mode) height image of a low coverage NP/HOPG sample. Scan size  $2.3\mu\text{m} \times 2.3\mu\text{m}$ , z scale 10 nm. b) example of cross section profile (along the white line in the upper panel). c) typical histogram of the nanoparticle height values obtained from the analysis of cross section profiles. A statistic analysis over several samples and several zones gives an average value of 4 nm with standard deviation of 0.5 nm.

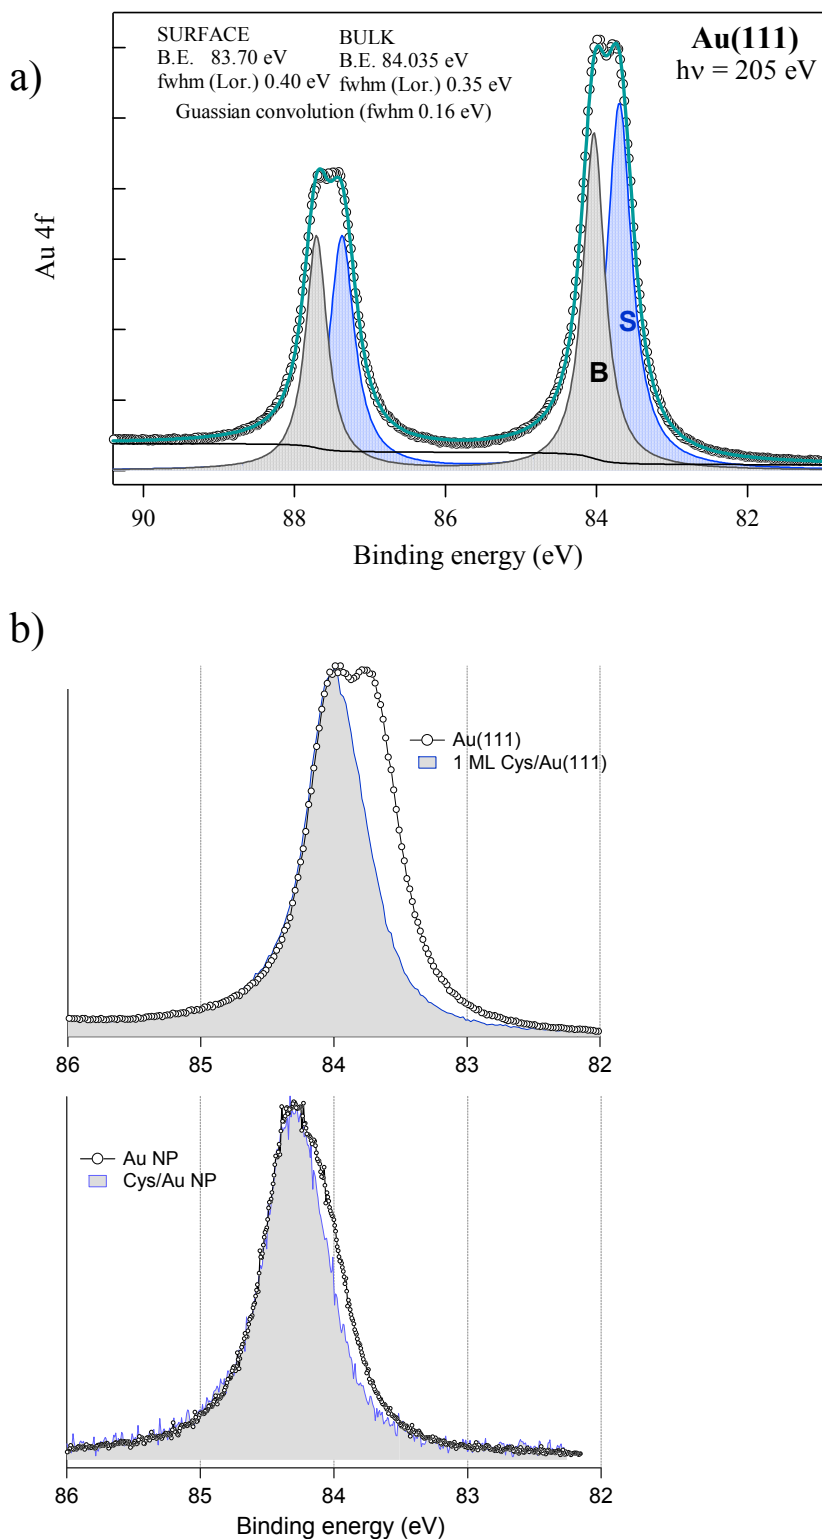

Fig.2

a) XPS Au4f measurement on Au(111) taken under conditions similar to those adopted in the paper. The fit was performed assuming two sub-components. Details on the surface (S) and bulk (B) components parameters are reported in the insets. Note that the relative intensity of the two sub-components may vary significantly with the photon energy because of photoelectron diffraction effects ( see e.g. ref. [62]).

b) Comparison between Au 4f spectra measured on Au NP before and after Cys chemisorption ( data of Fig. 4 of the main text). The peaks are normalized to the maximum intensity to emphasize the line shape modifications.
